# Supplementary material for: Recovery of uranium(vi) from aqueous solutions using a modified honeycomb-like porous carbon material
Source: Royal Society of Chemistry journal article supplement (doi:10.1039/c6dt03227c), 2016-11-21
Supplement: c6dt03227c1.pdf [file c6dt03227c1.pdf]

*Supporting Information*

## **Recovery of uranium from aqueous solutions by the modified honeycomb-like porous carbon material**

**Jiahui Zhu,<sup>a</sup> Qi Liu,<sup>\*a</sup> Zhanshuang Li,<sup>a</sup> Jingyuan Liu,<sup>a</sup> Hongsen Zhang,<sup>a</sup> Rumin Li,<sup>a</sup> and Jun Wang,<sup>\*a, b</sup> G.A. Emelchenko,<sup>c</sup>**

<sup>a</sup> Key Laboratory of Superlight Material and Surface Technology, Ministry of Education, Harbin Engineering University, Harbin 150001, China. Fax: +86 451 8253 3026; Tel: +86 451 8253 3026; E-mail address: zhqw1888@sohu.com

<sup>b</sup> Institute of Advanced Marine Materials, Harbin Engineering University, 150001, China.

<sup>c</sup> Institute of Solid State Physics, Russian Academy of Sciences, Chernogolovka, 142432, Russia.

\* Corresponding author: Tel.: +86 451 8253 3026; Fax: +86 451 8253 3026; E-mail: zhqw1888@sohu.com.

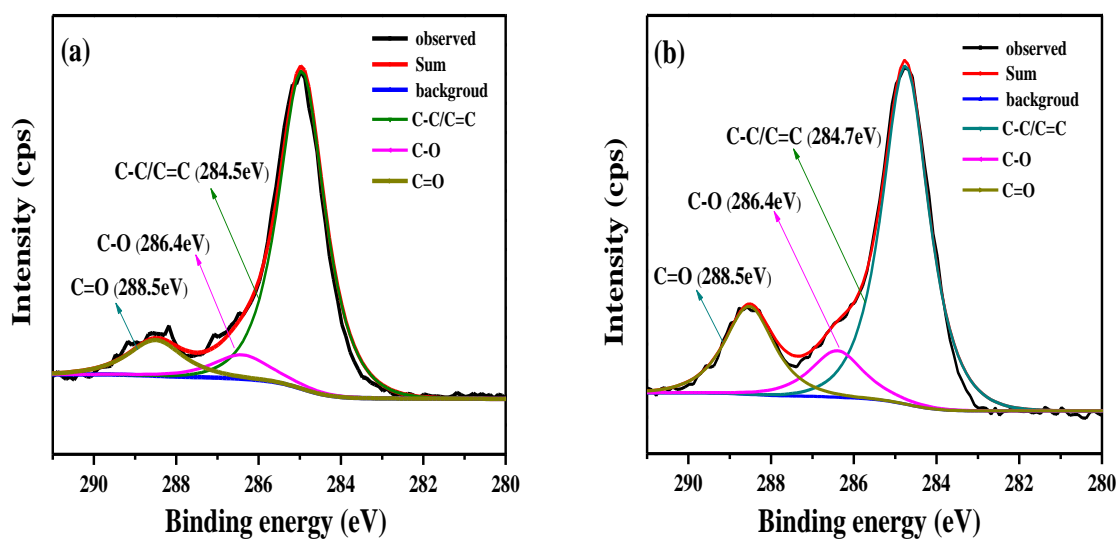

Fig. S1. The C1s spectra of HLPC/MnO<sub>2</sub> (a) and HLPC/MnO<sub>2</sub>/U.

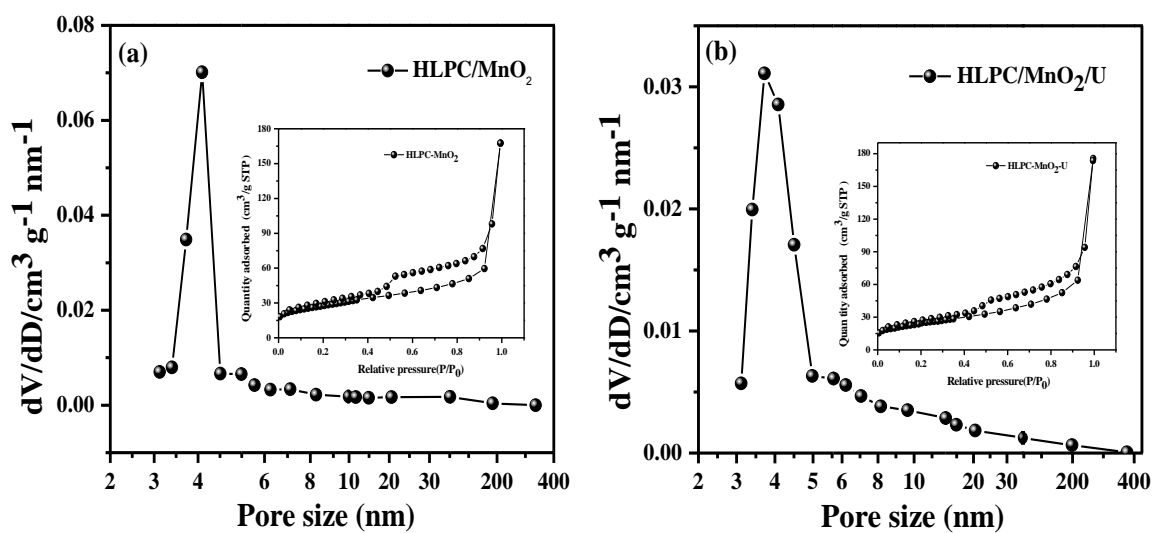

Fig. S2 (a) and (b) the pore size distributions of HLPC/MnO<sub>2</sub> and HLPC/MnO<sub>2</sub>/U.

The inset of (a) and (b) is N<sub>2</sub> adsorption/desorption isotherm of HLPC/MnO<sub>2</sub> and HLPC/MnO<sub>2</sub>/U.

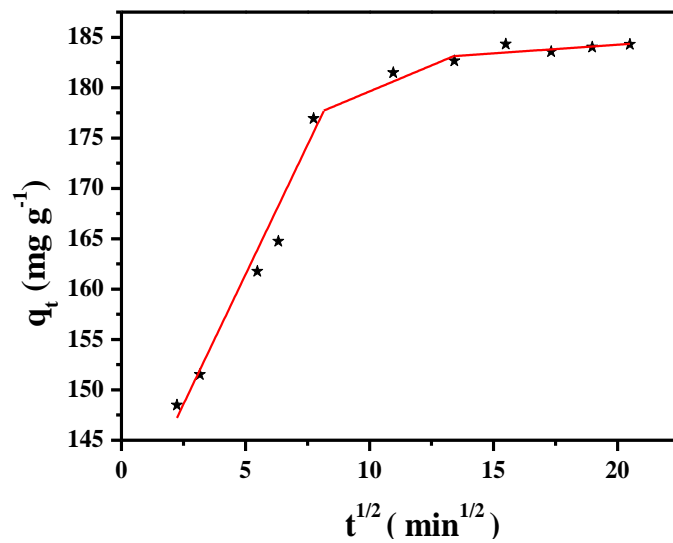

Fig. S3 Intra-particle diffusion kinetics for the adsorption of uranyl ions on HLPC/MnO<sub>2</sub>

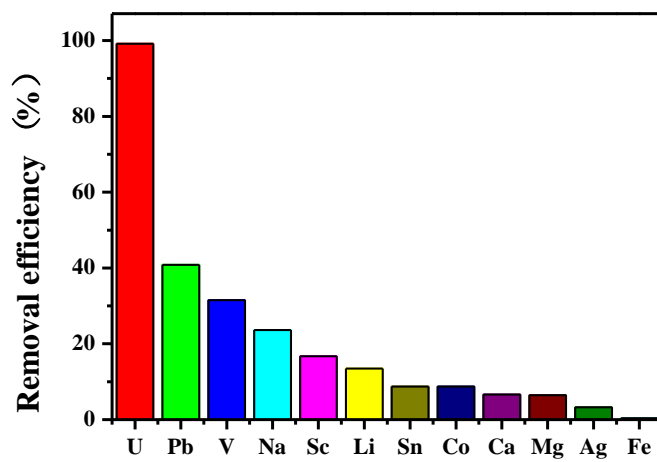

Fig. S4 Selected results of HLPC/MnO<sub>2</sub> for the extraction of uranyl ions from simulating seawater.

**Table S1** Elemental composition of the HLPC/MnO<sub>2</sub> and HLPC/MnO<sub>2</sub>/U samples determined by XPS spectra.

| Sample                   | XPS   |       |       |      | Binding energy |        |        |        |
|--------------------------|-------|-------|-------|------|----------------|--------|--------|--------|
|                          | C     | O     | Mn    | U    | C              | O      | Mn     | U      |
|                          | at%   | at%   | at%   | at%  | ev             | ev     | ev     | ev     |
| HLPC/MnO <sub>2</sub>    | 47.51 | 38.02 | 14.47 | 0    | 278.08         | 523.58 | 634.08 | —      |
| HLPC/MnO <sub>2</sub> /U | 32.92 | 49.58 | 16.47 | 1.03 | 284.74         | 530.22 | 642.11 | 381.85 |

**Table S2** Parameters of the intra-particle diffusion model of uranium (VI) adsorption on HLPC/MnO<sub>2</sub>

| T(K) | k <sub>p1</sub> | R <sub>1</sub> <sup>2</sup> | k <sub>p2</sub> | R <sub>2</sub> <sup>2</sup> | k <sub>p3</sub> | R <sub>3</sub> <sup>2</sup> |
|------|-----------------|-----------------------------|-----------------|-----------------------------|-----------------|-----------------------------|
| 298  | 5.148           | 0.975                       | 1.032           | 0.876                       | 0.173           | 0.316                       |

**Table. S3** Isotherm constants and values of R<sup>2</sup> for HLPC/MnO<sub>2</sub>.

| T(K) | Langmuir isotherm                      |                         |                | Freundlich isotherm    |        |                |
|------|----------------------------------------|-------------------------|----------------|------------------------|--------|----------------|
|      | q <sub>m</sub> (mg • g <sup>-1</sup> ) | b (L mg <sup>-1</sup> ) | R <sup>2</sup> | K (L g <sup>-1</sup> ) | n      | R <sup>2</sup> |
| 298  | 238.09                                 | 0.3258                  | 0.998          | 69.01                  | 0.3248 | 0.896          |
| 308  | 262.47                                 | 0.2679                  | 0.994          | 73.34                  | 0.3320 | 0.667          |
| 318  | 271.74                                 | 0.6513                  | 0.998          | 99.26                  | 0.3024 | 0.919          |

**Table. S4** The maximum adsorption capacity of different adsorbents for uranium (VI).

| Adsorbents                                           | Adsorption Capacity<br>mg-U/g-adsorbent | Conditions                                                                                                                 | Ref.      |
|------------------------------------------------------|-----------------------------------------|----------------------------------------------------------------------------------------------------------------------------|-----------|
| MnO <sub>2</sub> -coating of the cactus fibres       | 62                                      | $C_{\text{initial}} = 9 \times 10^{-6} - 9 \times 10^{-4} \text{ mol L}^{-1}$ ,<br>m = 10mg, V = 15 ml,<br>T = 298 K, pH=6 | [1]       |
| Salicylideneimine-functionalized hydrothermal carbon | 261                                     | $C_{\text{initial}} = 0.2 - 1.3 \text{ mmol L}^{-1}$ ,<br>m = 10 mg, V = 20 ml<br>T = 288.15 K, pH=4.3                     | [2]       |
| CaCl <sub>2</sub> -modified Giant Kelp biomass       | 156.25                                  | $C_{\text{initial}} = 20 - 100 \text{ mg L}^{-1}$ ,<br>m = 50 mg, V = 100 ml,<br>T = 293 K, pH =5                          | [3]       |
| imine-functionalized carbon spheres                  | 113.16                                  | $C_{\text{initial}} = 1 - 100 \text{ mg L}^{-1}$ ,<br>m = 50mg, V = 20 ml,<br>T = 298K, pH=4                               | [4]       |
| starch/SnO <sub>2</sub>                              | 192                                     | $C_{\text{initial}} = 10 - 150 \text{ mg L}^{-1}$ ,<br>m = 100 mg, V = 250 ml<br>T = 298 K, pH = 6                         | [5]       |
| ion-imprinted magnetic chitosan resins               | 187.26                                  | $C_{\text{initial}} = 15 - 420 \text{ mg L}^{-1}$ ,<br>m = 50 mg, V = 50 ml<br>T = 298 K, pH = 5                           | [6]       |
| Graphene oxide-manganese dioxide                     | 185.2                                   | $C_{\text{initial}} = 22.5 - 70 \text{ mg L}^{-1}$ ,<br>m = 10 mg, V = 20 ml<br>T = 298 K, pH = 3.8                        | [7]       |
| HLPC-MnO <sub>2</sub>                                | 238.09                                  | $C_{\text{initial}} = 30 - 300 \text{ mg L}^{-1}$ ,<br>m = 10 mg, V = 20 ml<br>T = 298 K, pH = 5                           | this work |

**Table S5.** Selected results for the extraction of uranyl ions from simulated seawater

| Elements | Ion concentration (ug L <sup>-1</sup> ) |                       | Removal (%) |
|----------|-----------------------------------------|-----------------------|-------------|
|          | initial                                 | final                 |             |
| U        | 3.131                                   | 0.026                 | 99.16       |
| Pb       | 0.424                                   | 0.251                 | 40.8        |
| V        | 0.489                                   | 0.335                 | 31.49       |
| Na       | 1.521×10 <sup>4</sup>                   | 1.162×10 <sup>4</sup> | 23.60       |
| Sc       | 249.1                                   | 207.4                 | 16.74       |
| Li       | 17.61                                   | 15.24                 | 13.46       |
| Sn       | 12.35                                   | 11.27                 | 8.74        |
| Co       | 0.63                                    | 0.575                 | 8.73        |
| Mg       | 6.289×10 <sup>3</sup>                   | 5.104×10 <sup>3</sup> | 6.44        |
| Ca       | 9.169×10 <sup>3</sup>                   | 8.563×10 <sup>3</sup> | 6.61        |
| Ag       | 0.521                                   | 0.504                 | 3.26        |
| Fe       | 104.3                                   | 103.9                 | 0.38        |

### References

1. M. Prodromou and I. Pashalidis, *J. Radioanal. Nucl. Chem.*, 2013, **298**, 1587-1595.
2. H. Wang, L. Ma, K. Cao, J. Geng, J. Liu, Q. Song, X. Yang and S. Li, *J. Hazard. Mater.*, 2012, **229**, 321-330.
3. L. Zhou, Y. Wang, H. Zou, X. Liang, K. Zeng, Z. Liu and A. A. Adesina, *J. Radioanal. Nucl. Chem.*, 2016, **307**, 635-644.
4. S. P. Dubey, A. D. Dwivedi, M. Sillanpää, Y.-N. Kwon and C. Lee, *RSC Adv.*, 2014, **4**, 46114-46121.
5. M. Naushad, T. Ahamad, G. Sharma, H. Ala'a, A. B. Albadarin, M. M. Alam, Z. A. AlOthman, S. M. Alshehri and A. A. Ghfar, *Chem. Eng. J.*, 2016, **300**, 306-316.
6. L. Zhou, C. Shang, Z. Liu, G. Huang and A. A. Adesina, *J. Colloid Interf. Sci.*, 2012, **366**, 165-172.
7. N. Pan, L. Li, J. Ding, S. Li, R. Wang, Y. Jin, X. Wang and C. Xia, *J. Hazard. Mater.*, 2016, **309**, 107-115.
